# Supplementary material for: Unusual Surge of Acute Hepatitis A Cases in 2016 and 2017 in Malaga, Southern Spain: Characterization and Relationship with Other Concurrent European Outbreaks
Source: MDPI journal article supplement (doi:10.3390/jcm12206613), 2023-10-19
Supplement: s1 [file s1]

**Supplementary Table S1. Summary of the main demographic and clinical characteristics of the study population.**

| Variables                                      |                            | Total         | p-value |
|------------------------------------------------|----------------------------|---------------|---------|
| Number of patients                             |                            | 184           |         |
| Average age in year (SD)                       |                            | 33(25.0-43.0) |         |
| Sex                                            | Male                       | 156(84.8)     | <0.001  |
|                                                | Female                     | 28(15.2)      |         |
| Origin                                         | Spanish                    | 149(81.0)     | <0.001  |
|                                                | Inmigrants                 |               |         |
|                                                | South American             | 8(4.3)        |         |
|                                                | European countries*        | 12(6.5)       |         |
|                                                | African                    | 2(1.1)        |         |
|                                                | Asian                      | 1(0.5)        |         |
|                                                | Unknown                    | 12(6.5)       |         |
| Risk behaviour                                 | MSM                        | 83(45.1)      | <0.001  |
|                                                | HTX                        | 2(1.1)        |         |
|                                                | Piercing, tatoos           | 1(0.5)        |         |
|                                                | Trip to endemic country    | 2(1.1)        |         |
|                                                | Familiar contact with HAV+ | 10(5.4)       |         |
|                                                | Food/water intake          | 1(0.5)        |         |
|                                                | Others                     | 56(30.4)      |         |
|                                                | Unknown                    | 29(15.8)      |         |
| Unique HAV infection<br>(without co-infection) | Yes                        | 152(82.6)     | <0.001  |
|                                                | No                         | 32(17.4)      |         |
|                                                | HIV                        | 16(8.7)       |         |
|                                                | HVB                        | 1(0.5)        |         |
|                                                | HIV+HBV                    | 1(0.5)        |         |
|                                                | HVC                        | 1(0.5)        |         |
|                                                | Syphilis                   | 7(3.8)        |         |
|                                                | Syphilis+HIV               | 5(2.7)        |         |
| Assistance<br>department                       | Syphilis+HIV+HBV           | 1(0.5)        | <0.001  |
|                                                | Primary care               | 41(22.3)      |         |
|                                                | Emergency department       | 86 (46.7)     |         |
|                                                | Out-Patient Consultation   | 18(9.8)       |         |
|                                                | In-patient stay            | 32(17.4)      |         |
| Clinical symptoms                              | Other hospital department  | 7(3.8)        | <0.001  |
|                                                | Yes                        | 155(84.2)     |         |
|                                                | No                         | 4(2.2)        |         |
|                                                | Unknown                    | 25(13.6)      |         |
| Outcome                                        | Hospitalization            | 46(13.6)      | 0.540   |
|                                                | Hospitalization in ICU     | 1(0.5)        | <0.001  |

The quantitative variable of age is expressed as median with IQR, whereas the qualitative variables as n (%).

\*Other than Spain

HIV: Human Immunodeficiency Virus; HVB: Hepatitis virus B; HTX: heterosexual transmission; HVC: Hepatitis virus C; ICU: intensive care unit; MSM: Men who have sex with men
