# Supplementary material for: Unusual Surge of Acute Hepatitis A Cases in 2016 and 2017 in Malaga, Southern Spain: Characterization and Relationship with Other Concurrent European Outbreaks
Source: MDPI journal article supplement (doi:10.3390/jcm12206613), 2023-10-19
Supplement: s1 [file s1]

## DEALING WITH DIFFERENT TOPOLOGIES (ML tree -Fig. 2- and Bayesian Inference -)

We employed the following commands to test the two topologies arisen by the two phylogenetic approaches and comprising the three sequences:

```
MrBayes > execute archivo.nex
```

```
MrBayes > constraint clustering = 20_HAV_Malaga 4_HAV_Malaga MF805872  
(identical to RIVM- HAV16- 090)
```

```
MrBayes> constraint noclustering negative = 20_HAV_Malaga 4_HAV_Malaga  
MF805872 (identical to RIVM- HAV16- 090)
```

**Hypothesis 1:** topology considering the clustering among 20 and 4 HAV Malaga strains with the original Dutch HAV strain RIVM-HAV16- 090

| Run   | Arithmetic mean | Harmonic mean |
|-------|-----------------|---------------|
| 1     | -3441.03        | -3467.47      |
| 2     | -3437.91        | -3470.62      |
| TOTAL | -3438.56        | -3469.97      |

**Hypothesis 2:** topology considering an independent clustering among 20 and 4 HAV Malaga strains, and the original Dutch HAV strain RIVM-HAV16- 090

| Run   | Arithmetic mean | Harmonic mean |
|-------|-----------------|---------------|
| 1     | -3435.67        | -3475.03      |
| 2     | -3439.09        | -3467.36      |
| TOTAL | -3436.33        | -3474.34      |

$2\log(B_{12}) = 2 * (-3469.97 - (-3474.34)) = 8.74$ , where  $B_{12}$  is the Bayes factor.  
According to the following table:

| $2\log_e(B_{12})$ | $B_{12}$  | Evidence against $H_2$             |
|-------------------|-----------|------------------------------------|
| 0 to 2            | 1 to 3    | Not worth more than a bare mention |
| 2 to 6            | 3 to 20   | Positive                           |
| 6 to 10           | 20 to 150 | Strong                             |
| > 10              | > 150     | Very strong                        |

Interpretation of the Bayes factor ( $B_{12}$ ). Based on (Kass and Raftery, 1995).

Therefore, there is strong evidence against the second hypothesis (compared to  $H_1$ ), that is, against a separate branch among local strains (20 HAV Malaga and 4 HAV Malaga) and the Dutch strain.
