# Supplementary material for: Unusual Surge of Acute Hepatitis A Cases in 2016 and 2017 in Malaga, Southern Spain: Characterization and Relationship with Other Concurrent European Outbreaks
Source: MDPI journal article supplement (doi:10.3390/jcm12206613), 2023-10-19
Supplement: s1 [file s1]

**Supplementary Table S3. Sampling date of the strains belonging to the Cluster I, linked to VRD\_521\_2016 strain.**

| <b>Strain</b> | <b>Sampling date (DD/MM/YYYY)</b> |
|---------------|-----------------------------------|
| 1_HAV_Malaga  | 12/12/2016                        |
| 2_HAV_Malaga  | 11/04/2017                        |
| 3_HAV_Malaga  | 22/05/2017                        |
| 5_HAV_Malaga  | 02/06/2017                        |
| 6_HAV_Malaga  | 24/03/2017                        |
| 7_HAV_Malaga  | 05/04/2017                        |
| 8_HAV_Malaga  | 05/10/2017                        |
| 9_HAV_Malaga  | 04/04/2017                        |
| 10_HAV_Malaga | 22/11/2016                        |
| 11_HAV_Malaga | 05/12/2016                        |
| 12_HAV_Malaga | 01/06/2017                        |
| 13_HAV_Malaga | 01/03/2017                        |
| 14_HAV_Malaga | 09/03/2017                        |
| 15_HAV_Malaga | 03/03/2017                        |
| 16_HAV_Malaga | 02/05/2017                        |
| 17_HAV_Malaga | 20/01/2017                        |
| 18_HAV_Malaga | 11/04/2016                        |
| 21_HAV_Malaga | 28/06/2017                        |
| 23_HAV_Malaga | 31/07/2017                        |
| 24_HAV_Malaga | 30/03/2017                        |
