# Supplementary material for: Unusual Surge of Acute Hepatitis A Cases in 2016 and 2017 in Malaga, Southern Spain: Characterization and Relationship with Other Concurrent European Outbreaks
Source: MDPI journal article supplement (doi:10.3390/jcm12206613), 2023-10-19
Supplement: s1 [file s1]

**Supplementary Table S2. Baseline biochemical and haematological characteristics of the study population.**

| Variables                            | Mean $\pm$ SD       | Reference ranges |
|--------------------------------------|---------------------|------------------|
| Total of patients                    | 184                 |                  |
| <i>Biochemical parameters</i>        |                     |                  |
| Albumin (g/dL)                       | 3.4 $\pm$ 0.5       | 3.5 - 5.5        |
| Alkaline phosphatase (U/L)           | 198.7 $\pm$ 143.7   | 20 - 125         |
| C-reactive protein (mg/dL)           | 12.5 $\pm$ 12.6     | < 0.5            |
| Direct bilirubin (mg/dL)             | 5.4 $\pm$ 2.5       | 0 - 0.3          |
| Direct bilirubin zenith (mg/dL)      | 5.7 $\pm$ 2.5       |                  |
| Total bilirubin (mg/dL)              | 5.7 $\pm$ 3.8       | 0.3–1.2          |
| Total bilirubin zenith (mg/dL)       | 6.7 $\pm$ 5.7       |                  |
| SGGT (UI)                            | 275.5 $\pm$ 246.3   | 8-78             |
| SGOT (UI)                            | 1305.8 $\pm$ 1331.1 | 0 - 35           |
| SGOT zenith (UI)                     | 1616.9 $\pm$ 1693.5 |                  |
| SGPT (UI)                            | 1630.4 $\pm$ 1658.4 | 0 - 35           |
| SGPT zenith (UI)                     | 1716.3 $\pm$ 1774.4 |                  |
| Lactate dehydrogenase (U/L)          | 530.1 $\pm$ 460.3   | 60-160           |
| Total cholesterol (mg/dl)            | 142.8 $\pm$ 62.3    | 140 - 200        |
| Serum creatinin (mg/L)               | 0.9 $\pm$ 0.2       | 0.7-1.3          |
| Urea (U/L)                           | 25.3 $\pm$ 9.8      | 20 - 50          |
| <i>Haemogram</i>                     |                     |                  |
| Prothrombin time (%)                 | 73.5 $\pm$ 18.8     | 80 - 120         |
| International Normalized Ratio (INR) | 1.2 $\pm$ 0.2       | 0.8 - 1.2        |
| Red blood cells count (cells/L)      | 5.0 $\pm$ 0.7       | 3.6 - 6.0        |
| Hematocrit (%)                       | 43.5 $\pm$ 4.6      | 35 - 46          |
| Leukocytes count (cells/L)           | 6.3 $\pm$ 2.5       | 4 - 11.5         |
| Platelets count (cells/L)            | 230.6 $\pm$ 83.6    | 140 - 450        |

SGGT, serum gamma-glutamyl transferase; SGOT, serum glutamic oxaloacetic transaminase; SGPT, serum glutamic pyruvic transaminase;
