# Supplementary material for: Unusual Surge of Acute Hepatitis A Cases in 2016 and 2017 in Malaga, Southern Spain: Characterization and Relationship with Other Concurrent European Outbreaks
Source: J Clin Med. 2023 Oct 19;12(20):6613. doi: 10.3390/jcm12206613 (PMC10607832; doi:10.3390/jcm12206613)
Supplement: Supplementary file 1 [file jcm-12-06613-s001.zip]

Archive with 7 entries (7 files):
- Figure S1.jpg
- Figure S2.jpg
- Supplementary material S1.xls
- Supplementary material S2.pdf
- Supplementary Table S1.pdf
- Supplementary Table S2.pdf
- Supplementary Table S3.pdf
