# Supplementary material for: Unusual Surge of Acute Hepatitis A Cases in 2016 and 2017 in Malaga, Southern Spain: Characterization and Relationship with Other Concurrent European Outbreaks
Source: J Clin Med. 2023 Oct 19;12(20):6613. doi: 10.3390/jcm12206613 (PMC10607832; doi:10.3390/jcm12206613)
Supplement: Supplementary file 1 [file jcm-12-06613-s001.zip › Supplementary material S1.xls]

## Sheet: Sheet 1
name	begin	length	end	BLAST	BLAST score	refseq	reverse complement	type	type support	subtype	subtype support
20_HAV_Malaga	2923	509	3433	Hepatitis A virus	97.81746	NC_001489	false	IA	100.0	IA_ac	100.0
4_HAV_Malaga	2923	510	3433	Hepatitis A virus	94.047615	NC_001489	false	IA	100.0	IA_ac	100.0
26_HAV_Malaga	2923	511	3433	Hepatitis A virus	91.30435	NC_001489	false	IA	100.0	IA_ad	93.0
27_HAV_Malaga	2923	510	3433	Hepatitis A virus	90.51383	NC_001489	false	IA	95.0	Could not assign
22_HAV_Malaga	2922	510	3433	Hepatitis A virus	94.70588	NC_001489	false	IA	97.0	Could not assign
14_HAV_Malaga	2923	510	3433	Hepatitis A virus	94.83102	NC_001489	false	IA	94.0	IA_ab	100.0
15_HAV_Malaga	2923	510	3433	Hepatitis A virus	96.82539	NC_001489	false	IA	94.0	IA_ab	100.0
2_HAV_Malaga	2923	510	3433	Hepatitis A virus	96.82539	NC_001489	false	IA	95.0	IA_ab	100.0
24_HAV_Malaga	2923	510	3433	Hepatitis A virus	96.82539	NC_001489	false	IA	97.0	IA_ab	100.0
23_HAV_Malaga	2923	510	3433	Hepatitis A virus	96.82539	NC_001489	false	IA	98.0	IA_ab	100.0
11_HAV_Malaga	2923	368	3291	Hepatitis A virus	95.027626	NC_001489	false	IA	95.0	IA_ab	97.0
13_HAV_Malaga	2923	510	3433	Hepatitis A virus	96.62698	NC_001489	false	IA	99.0	IA_ab	100.0
6_HAV_Malaga	2923	510	3433	Hepatitis A virus	96.82539	NC_001489	false	IA	97.0	IA_ab	100.0
10_HAV_Malaga	2923	510	3433	Hepatitis A virus	96.82539	NC_001489	false	IA	98.0	IA_ab	100.0
8_HAV_Malaga	2923	510	3433	Hepatitis A virus	96.82539	NC_001489	false	IA	94.0	IA_ab	99.0
21_HAV_Malaga	2923	510	3433	Hepatitis A virus	96.82539	NC_001489	false	IA	98.0	IA_ab	100.0
7_HAV_Malaga	2923	510	3433	Hepatitis A virus	96.82539	NC_001489	false	IA	96.0	IA_ab	100.0
1_HAV_Malaga	2923	510	3433	Hepatitis A virus	96.82539	NC_001489	false	IA	97.0	IA_ab	100.0
3_HAV_Malaga	2923	510	3433	Hepatitis A virus	96.82539	NC_001489	false	IA	97.0	IA_ab	100.0
16_HAV_Malaga	2923	510	3433	Hepatitis A virus	96.82539	NC_001489	false	IA	97.0	IA_ab	100.0
18_HAV_Malaga	2923	510	3433	Hepatitis A virus	96.62698	NC_001489	false	IA	97.0	IA_ab	100.0
17_HAV_Malaga	2923	511	3433	Hepatitis A virus	90.29703	NC_001489	false	Unassigned
12_HAV_Malaga	2923	292	3215	Hepatitis A virus	96.969696	NC_001489	false	Unassigned
9_HAV_Malaga	2923	217	3140	Hepatitis A virus	96.74796	NC_001489	false	IA	71.0	Could not assign
5_HAV_Malaga	2923	274	3197	Hepatitis A virus	95.93023	NC_001489	false	Unassigned
